# Supplementary material for: Hyperuricaemia Does Not Interfere with Aortopathy in a Murine Model of Marfan Syndrome
Source: MDPI journal article supplement (doi:10.3390/ijms241411293), 2023-07-10
Supplement: s1 [file s1]

## SUPPLEMENTARY MATERIAL

# Hyperuricaemia Does Not Interfere with Aortopathy in a Murine Model of Marfan Syndrome

Isaac Rodríguez-Rovira <sup>1</sup>, Angela López-Sainz <sup>2</sup>, Maria Encarnación Palomo-Buitrago <sup>1</sup>, Belen Pérez <sup>3</sup>, Francesc Jiménez-Altayó <sup>3</sup>, Victoria Campuzano <sup>1,4</sup> and Gustavo Egea <sup>1,5,\*</sup>

<sup>1</sup> Department of Biomedical Sciences, School of Medicine and Health Sciences, University of Barcelona, 08036 Barcelona, Spain

<sup>2</sup> Department of Cardiology, Hospital Clínic de Barcelona, IDIBAPS, 08036 Barcelona, Spain

<sup>3</sup> Department of Pharmacology, School of Medicine, Autonomous University of Barcelona, Bellaterra, 08192 Barcelona, Spain

<sup>4</sup> Centro de Investigación Biomédica en Red de Enfermedades Raras (CIBERER), ISCIII, 28029 Madrid, Spain

<sup>5</sup> UZA/UA Center of Medical Genetics, University of Antwerp, 2650 Edegem, Belgium

\* Correspondence: gegea@ub.edu

## SUPPLEMENTARY FIGURE LEGENDS

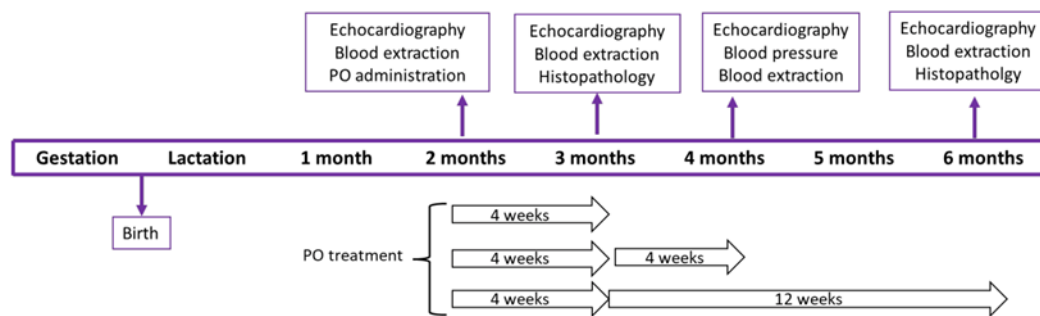

Received: 24 May 2023

Revised: 30 June 2023

Accepted: 7 July 2023

Published: 10 July 2023

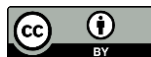

**Copyright:** © 2023 by the authors. Submitted for possible open access publication under the terms and conditions of the Creative Commons Attribution (CC BY) license (<https://creativecommons.org/licenses/by/4.0/>).

**Supplementary Figure S1. Representative scheme of the experimental protocols for allopurinol treatments.** PO: potassium oxonate. PO was administered to WT and MFS mice for four weeks. Some animals were euthanized and other continued receiving PO for additional 4 weeks or 12 weeks for a total time of 8 and 16 weeks, respectively.

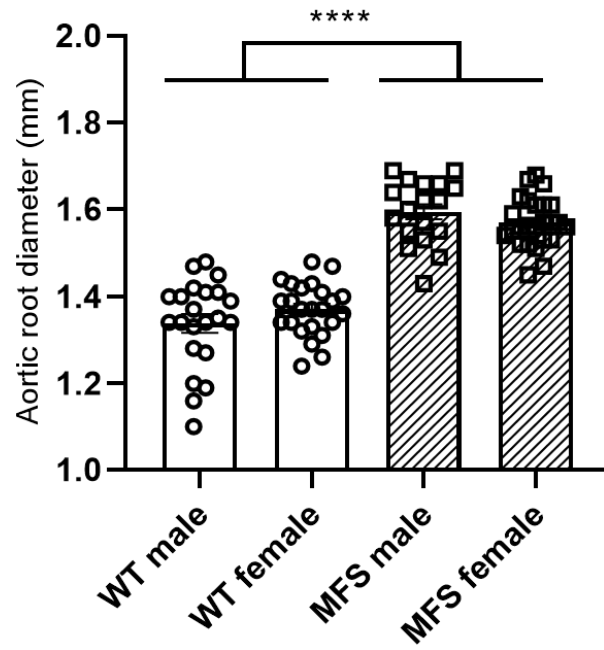

**Supplementary Figure S2. Aortic root diameter in WT and MFS mice at the start point of the study (two months old).** The aortic root diameter of male and female WT and MFS mice was measured with 2D echocardiography. Results are the mean  $\pm$  SEM. Statistical test: Two-way ANOVA. \*\*\*\* $p \leq 0.0001$ .

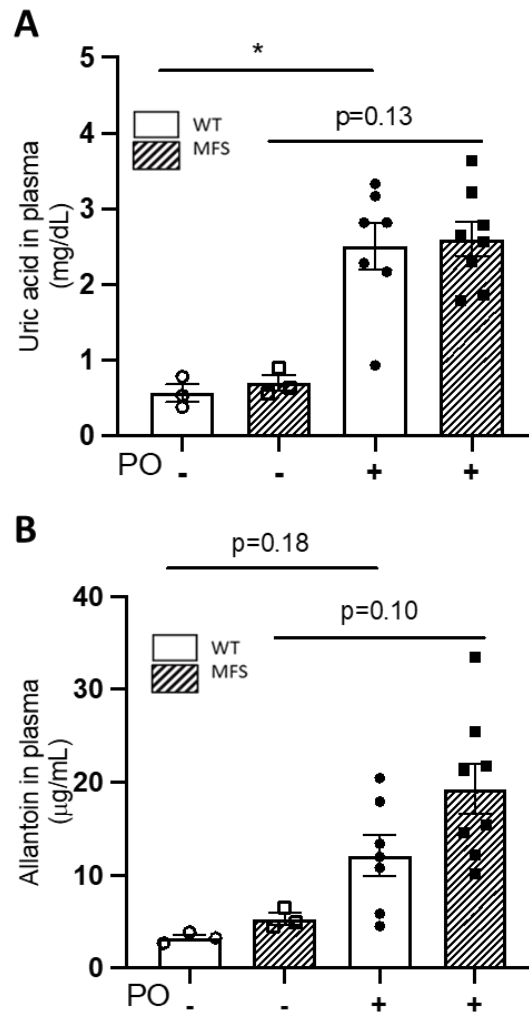

**Supplementary Figure S3. Uric acid and allantoin plasma levels following eight weeks of potassium oxonate treatment.** Three-month-old WT and MFS mice (treated with PO for four weeks) continued receiving PO treatment for four weeks more (total of eight weeks of PO treatment; four-month-old mice) and their uric acid (A) and allantoin (B) plasma levels were determined. Results are the mean  $\pm$  SEM. Statistical tests: Kruskal–Wallis, Dunn’s post hoc. \* $p \leq 0.05$

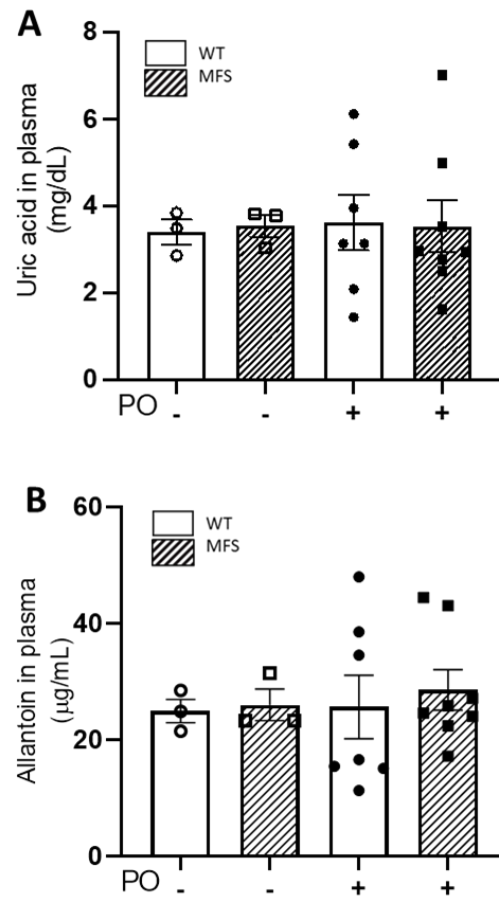

**Supplementary Figure S4. Uric acid and allantoin plasma levels following 16 weeks of potassium oxonate treatment.** Male WT and MFS mice treated for eight weeks with potassium oxonate (PO) were treated for an additional eight weeks (16 weeks of PO treatment; six-month-old mice); uric acid (**A**) and allantoin (**B**) plasma levels were determined. Results are the mean  $\pm$  SEM. Statistical test: Kruskal–Wallis.

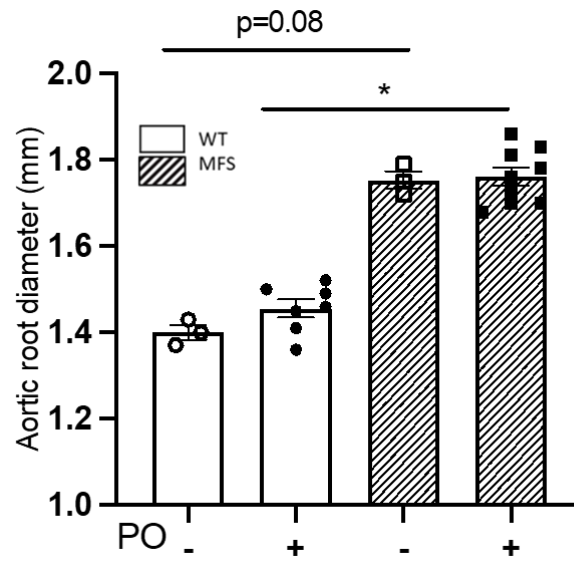

**Supplementary Figure S5. Aortic root diameter in WT and MFS mice following eight weeks of potassium oxonate treatment.** Male WT and MFS mice treated for four weeks with potassium oxonate (PO) were treated for an additional four weeks (eight weeks of PO treatment; four-month-old mice) and the aortic root diameter was measured again with 2D echocardiography. Results are the mean  $\pm$  SEM. Statistical tests: Kruskal–Wallis, Dunn’s post hoc. \* $p \leq 0.05$ .

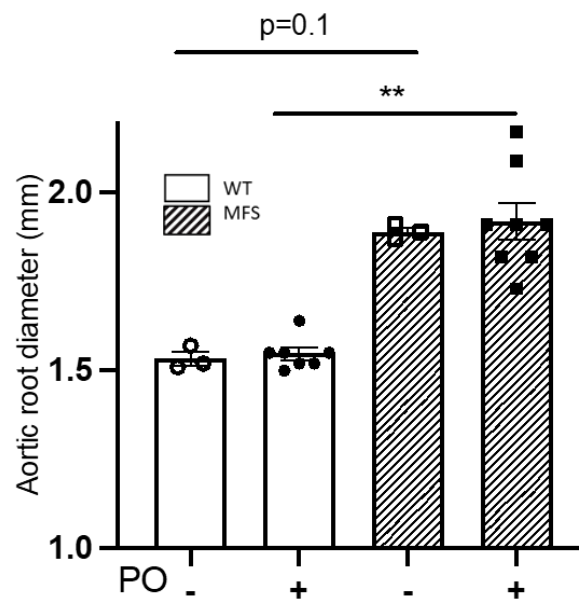

**Supplementary Figure S6. Aortic root diameter in WT and MFS mice following 16 weeks of potassium oxonate treatment.** Male WT and MFS mice treated for eight weeks with potassium oxonate (PO) were treated for an additional eight weeks (16 weeks of PO treatment; six-month-old mice) and the aortic root diameter was measured again with 2D echocardiography. Results are the mean  $\pm$  SEM. Statistical tests: Kruskal–Wallis, Dunn’s post hoc. \*\* $p \leq 0.01$ .

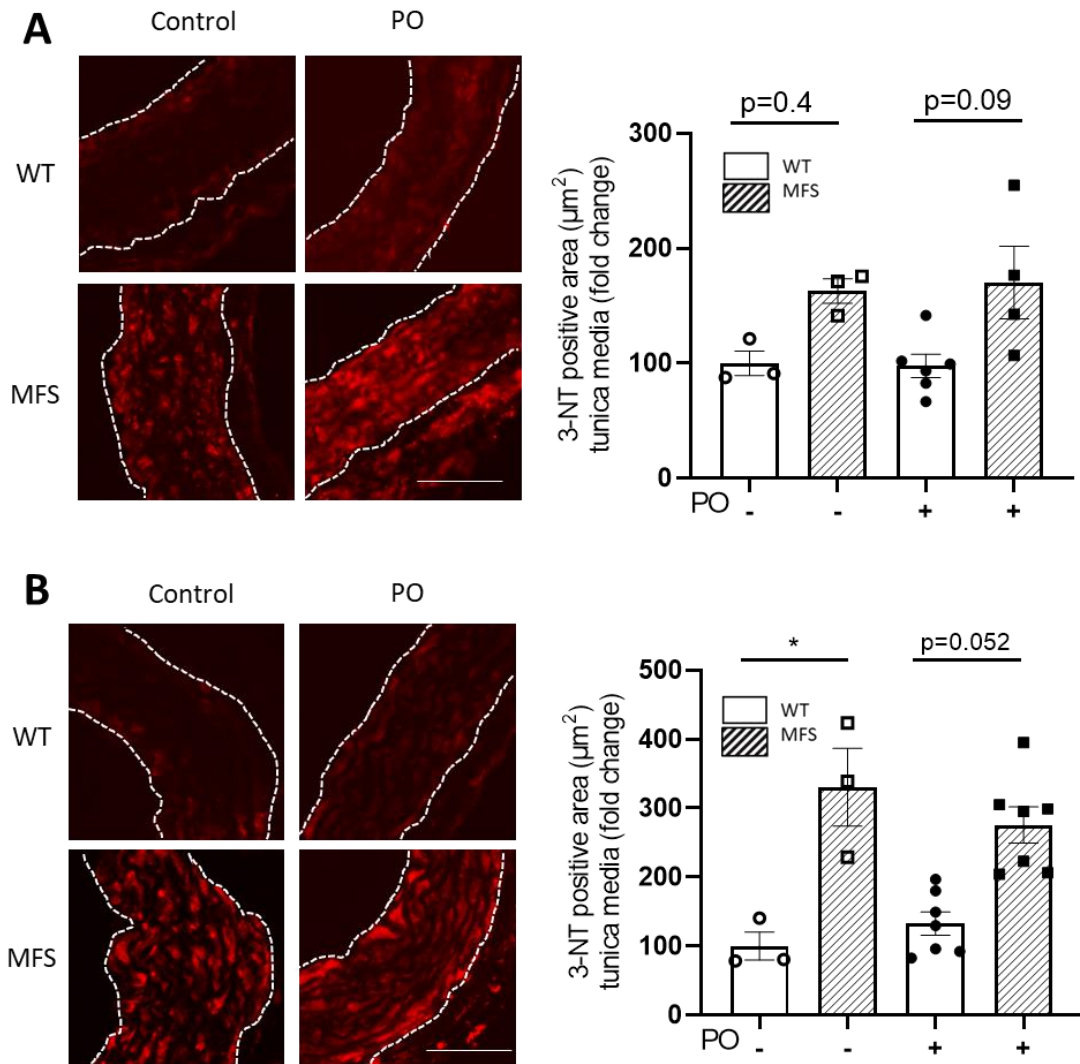

**Supplementary Figure S7. 3'-nitrotyrosine levels in the aortic media of WT and MFS mice treated with potassium oxonate.** Representative images and quantitative analysis of 3-nitrotyrosine (3-NT) levels in the aortic tunica media of WT and MFS mice treated with potassium oxonate (PO) for 4 weeks (**A**) and 16 weeks (**B**) (mice aged 3 and 6 months of age, respectively). The tunica media is delineated with dashed white lines. Bar, 100  $\mu\text{m}$ . Statistical tests: Kruskal–Wallis and Dunn's multiple comparison tests. \* $p \leq 0.05$ .

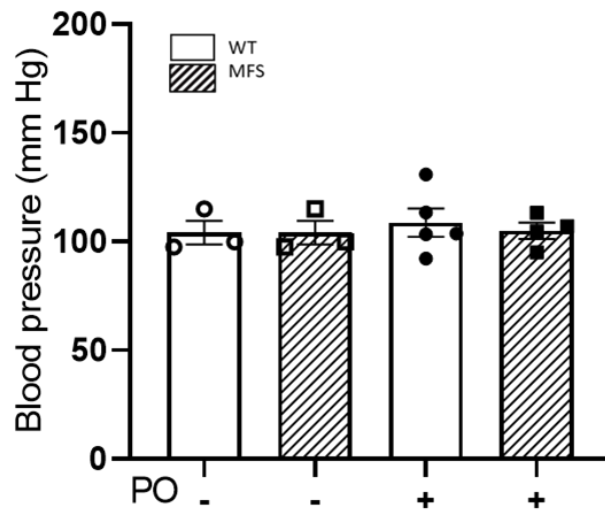

**Supplementary Figure S8. Systolic blood pressure in WT and MFS treated with potassium oxonate.** Systolic blood pressure measurements in four-month-old WT and MFS mice treated with potassium oxonate (PO; eight weeks). Results are the mean  $\pm$  SEM. Statistical test: Kruskal-Wallis with Dunn's multiple comparison test.
